# Supplementary material
Source: MDPI journal article supplement (https://www.mdpi.com/search?q=marinedrugs-19-00170)
Supplement: s001 [file marinedrugs-19-00170-s001.pdf]

## *Supporting Material*

*Article*

# **Stereochemical Determination of Fistularins isolated from the Marine Sponge *Ecionemia acervus* and their Regulatory Effect on Intestinal Inflammation**

**Yeong Kwang Ji<sup>1†</sup>, Seon Min Lee<sup>2†</sup>, Na-Hyun Kim<sup>2</sup>, Nguyen Van Tu<sup>4</sup>, Yun Na Kim<sup>3</sup>, Jeong Doo Heo<sup>2</sup>, Eun Ju Jeong<sup>3\*</sup> and Jung-Rae Rho<sup>1\*</sup>**

<sup>1</sup> Department of Oceanography, Kunsan National University, Gunsan 54150, Republic of Korea; kwang7089@kunsan.ac.kr

<sup>2</sup> Gyeongnam Department of Environment & Toxicology, Korea Institute of Toxicology, 17 Jegok-gil, Munsan-eup 52834, Republic of Korea smlee84@kitox.re.kr(S.M.L.); [nhkim@kitox.re.kr](mailto:nhkim@kitox.re.kr) (N.-H.K.); jdher@kitox.re.kr(J.D.H.)

<sup>3</sup> Department of Plant & Biomaterials Sciences, Gyeongsang National University, Jinju 52725, Republic of Korea; ; [yunna@gnitech.ac.kr](mailto:yunna@gnitech.ac.kr)

<sup>4</sup> Institute of Tropical Biology, 85 Tran Quoc Toan Street District 3, Ho Chi Minh 700000, Vietnam; nguyen.tu@itb.ac.vn

\* Correspondence: [jrrho@kunsan.ac.kr](mailto:jrrho@kunsan.ac.kr)(J.-R. R.); [ejeong@gnitech.ac.kr](mailto:ejeong@gnitech.ac.kr)(E.J.J.); Tel.: +82 63 469 4606(J.-R.R.); +82 55 751 3224 (E.J.J.)

† These authors contributed equally to this work

# Contents

|                                                                                                                                                   |    |
|---------------------------------------------------------------------------------------------------------------------------------------------------|----|
| Figure S1. CD spectra for compounds <b>1–6</b> . -----                                                                                            | 3  |
| Figure S2. <sup>1</sup> H and <sup>13</sup> C NMR spectra for <b>1</b> in CD <sub>3</sub> OD. -----                                               | 3  |
| Figure S3. <sup>1</sup> H and <sup>13</sup> C NMR spectra for <b>2</b> in CD <sub>3</sub> OD -----                                                | 4  |
| Figure S4. <sup>1</sup> H and <sup>13</sup> C NMR spectra for <b>3</b> in CD <sub>3</sub> OD -----                                                | 5  |
| Figure S5. <sup>1</sup> H and <sup>13</sup> C NMR spectra for <b>4</b> in CD <sub>3</sub> OD -----                                                | 6  |
| Figure S6. <sup>1</sup> H and <sup>13</sup> C NMR spectra for <b>5</b> in CD <sub>3</sub> OD -----                                                | 7  |
| Figure S7. <sup>1</sup> H and <sup>13</sup> C NMR spectra for <b>6</b> in CD <sub>3</sub> OD -----                                                | 8  |
| Figure S8. (A) <sup>1</sup> H NMR and (B) <sup>13</sup> C NMR spectra of <b>3</b> in acetone- <i>d</i> <sub>6</sub> . -----                       | 9  |
| Figure S9. <sup>1</sup> H NMR spectra for (A) ( <i>S</i> )-MTPA ester<br>and (B) ( <i>R</i> )-MTPA ester of <b>3</b> in CDCl <sub>3</sub> . ----- | 10 |
| Figure S10. COSY NMR spectra for (A) ( <i>S</i> )-MTPA ester<br>and (B) ( <i>R</i> )-MTPA ester of <b>3</b> in CDCl <sub>3</sub> . -----          | 11 |
| Table S1. NMR Chemical shifts for compounds <b>1-2</b> (500MHz for <sup>1</sup> H, in CD <sub>3</sub> OD).-----                                   | 12 |
| Table S2. Calculated Carbon Shielding Tensors for Conformers of <b>1a</b> -----                                                                   | 14 |
| Table S3. Calculated Proton Shielding Tensors for Conformers of <b>1a</b> -----                                                                   | 15 |
| Table S4. Calculated Carbon Shielding Tensors for Conformers of <b>1b</b> -----                                                                   | 16 |
| Table S5. Calculated Proton Shielding Tensors for Conformers of <b>1b</b> -----                                                                   | 17 |
| Table S6. Calculation of DP4+ probability for <b>1a</b> and <b>1b</b> . -----                                                                     | 17 |

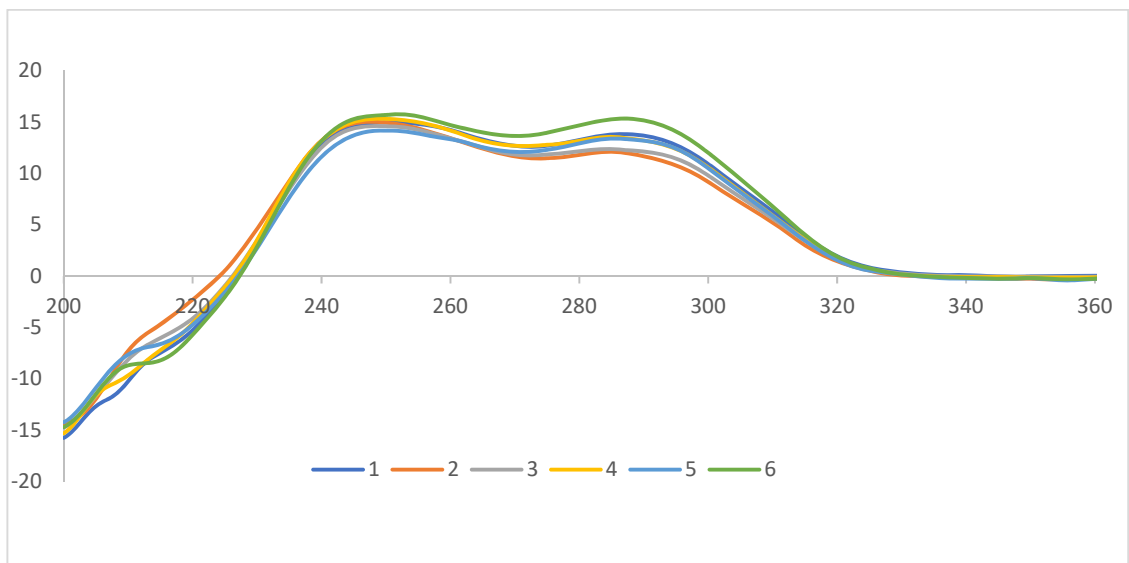

Figure S1. CD spectra for compounds 1–6.

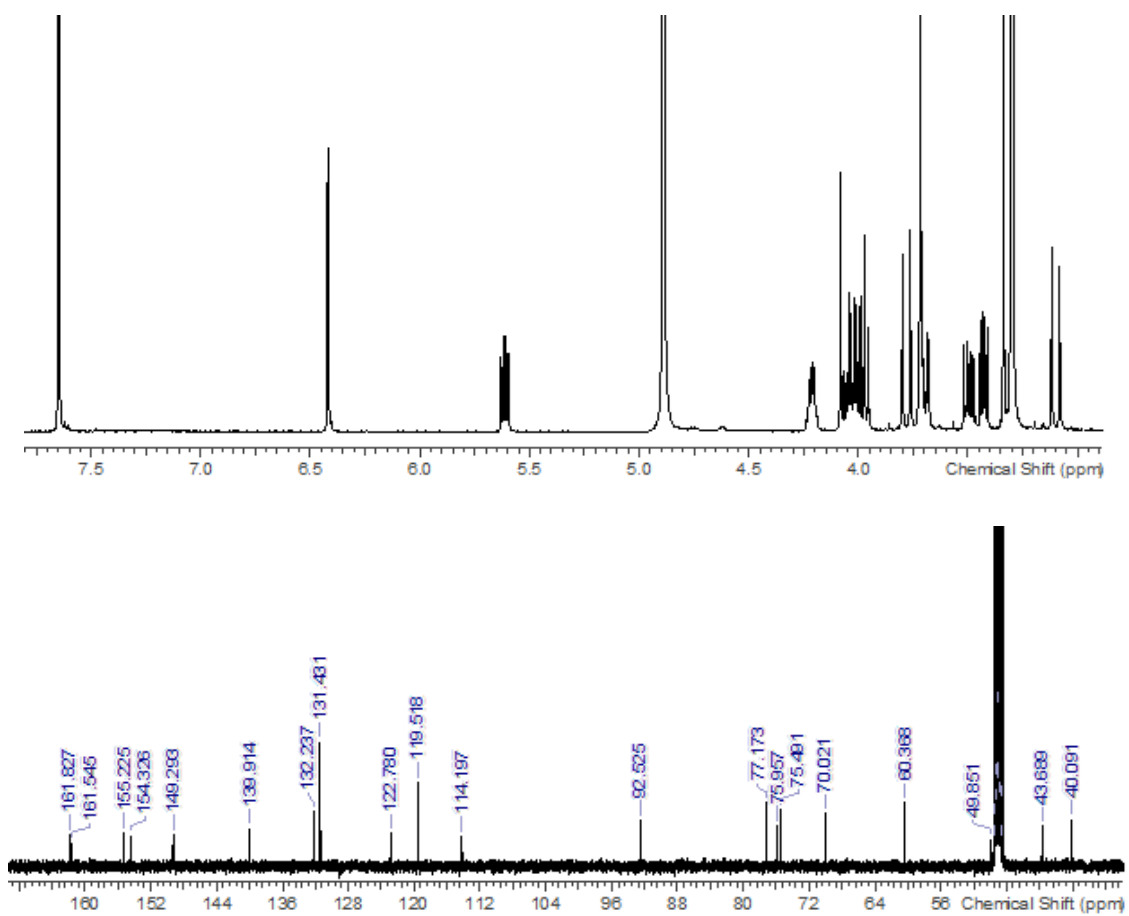

Figure S2.  $^1\text{H}$  and  $^{13}\text{C}$  NMR spectra for 1 in  $\text{CD}_3\text{OD}$ .

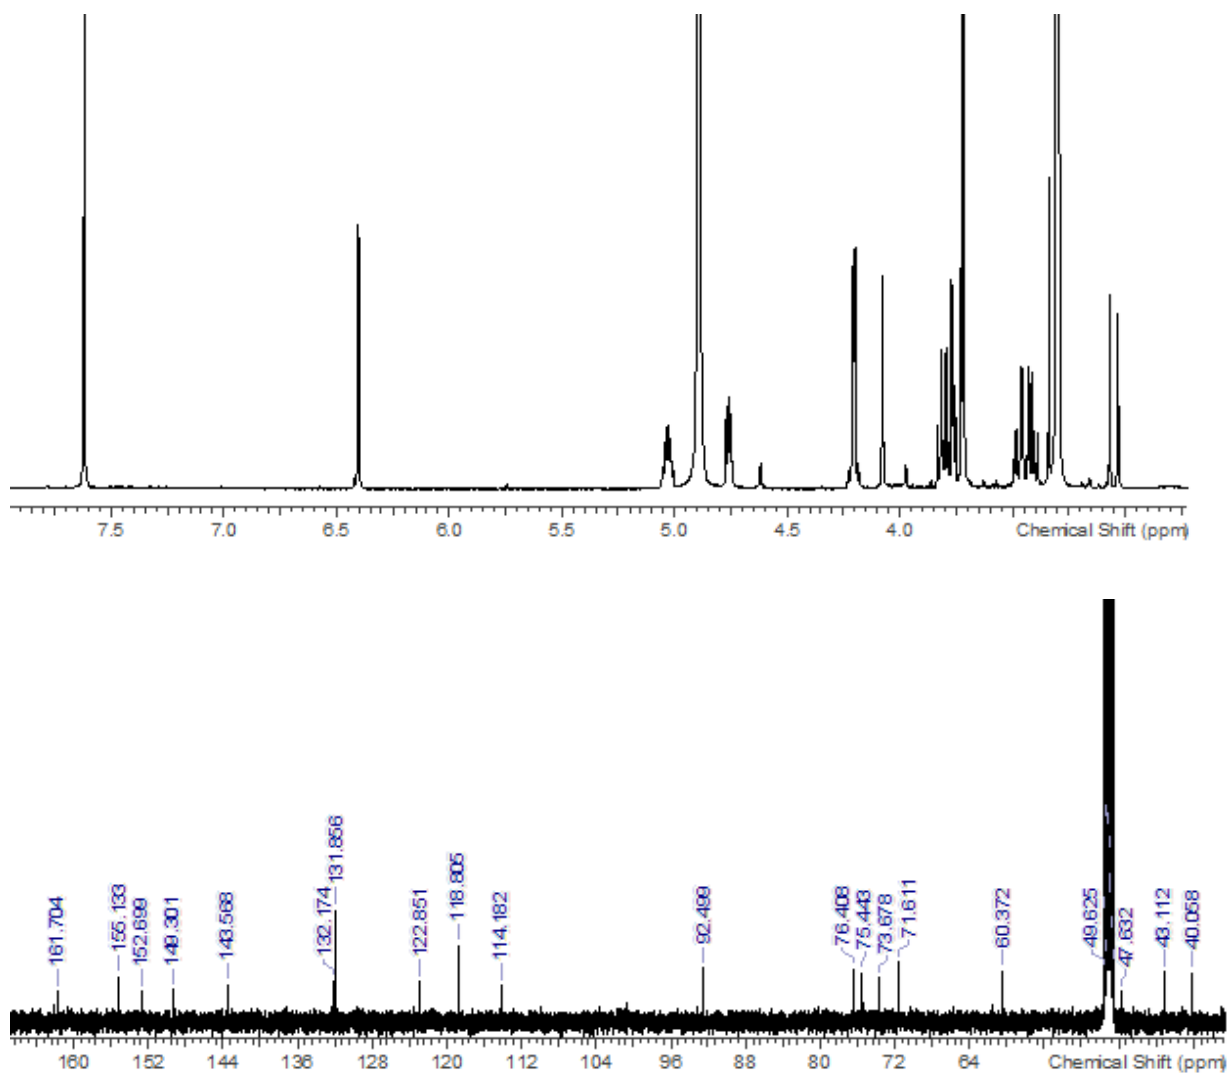

Figure S3. <sup>1</sup>H and <sup>13</sup>C NMR spectra for 2 in CD<sub>3</sub>OD.

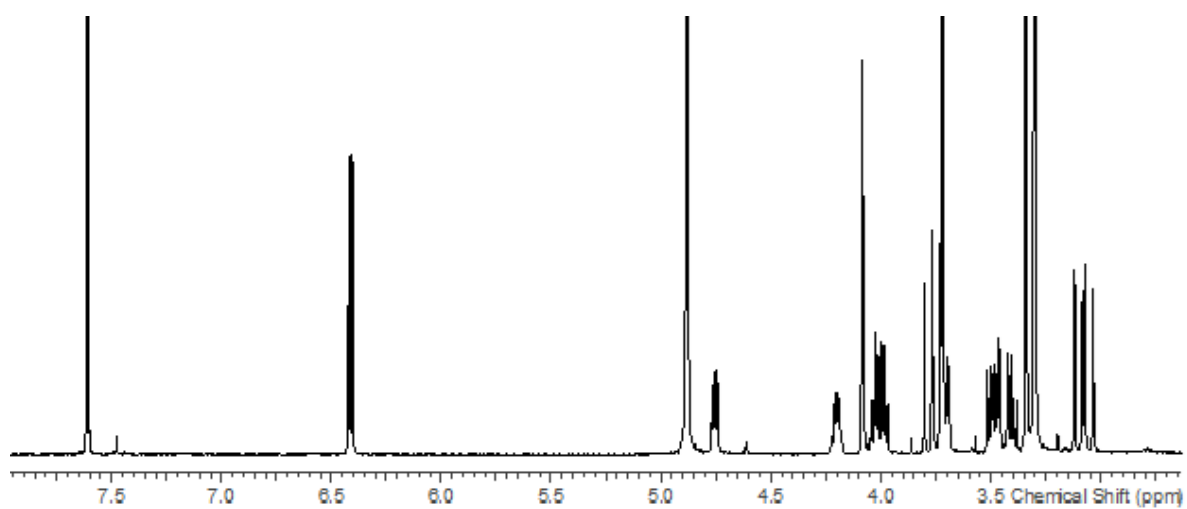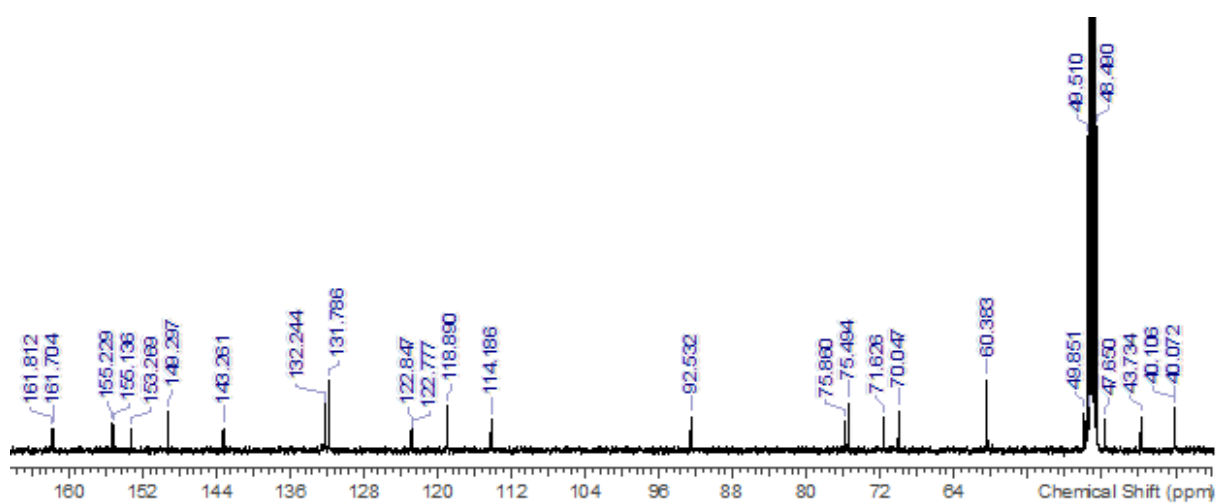

Figure S4.  $^1\text{H}$  and  $^{13}\text{C}$  NMR spectra for **3** in  $\text{CD}_3\text{OD}$ .

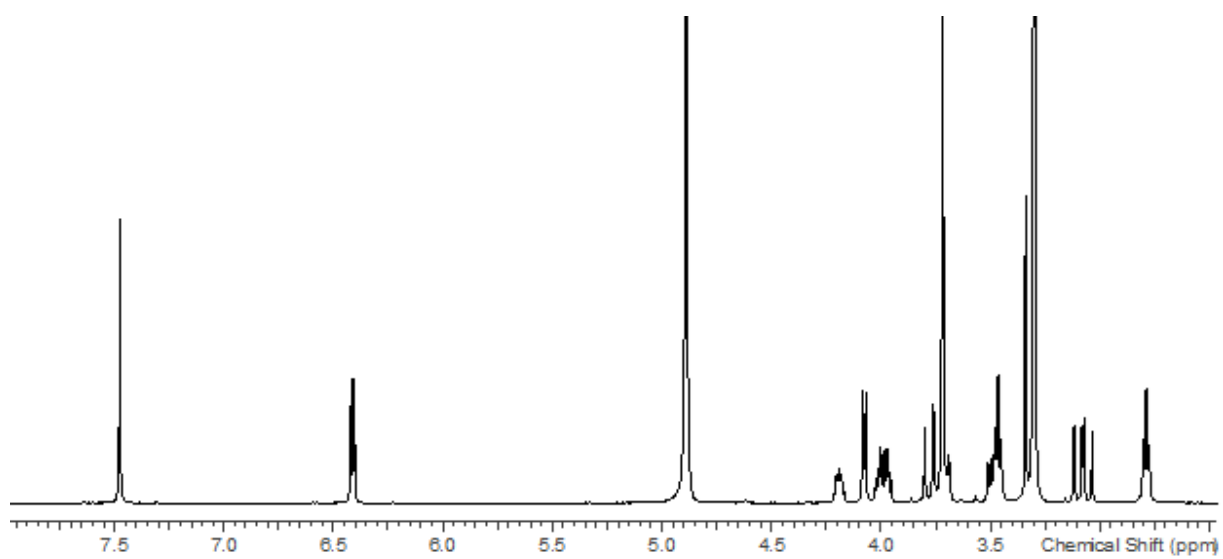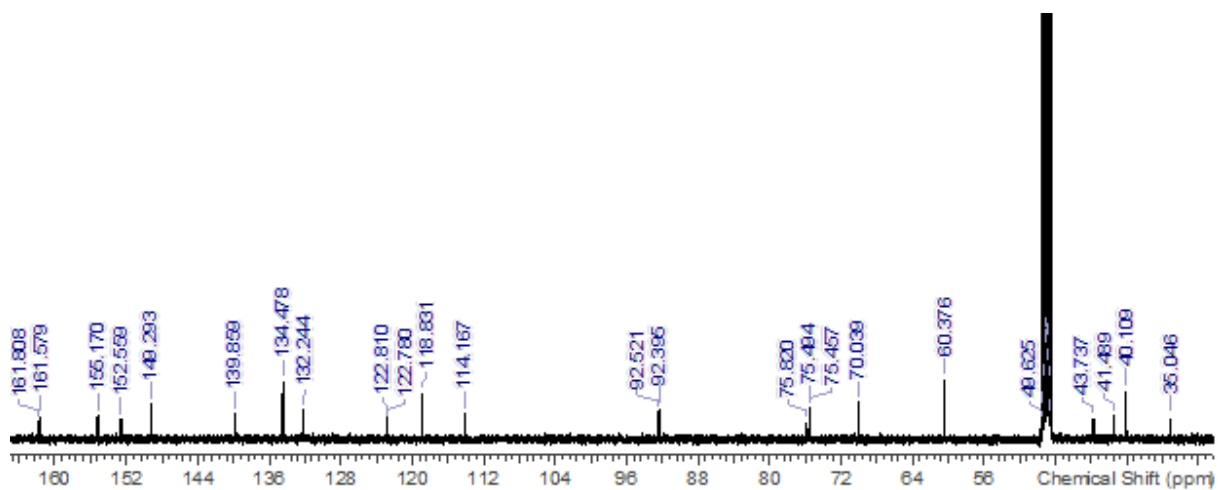

Figure S5.  $^1\text{H}$  and  $^{13}\text{C}$  NMR spectra for **4** in  $\text{CD}_3\text{OD}$ .

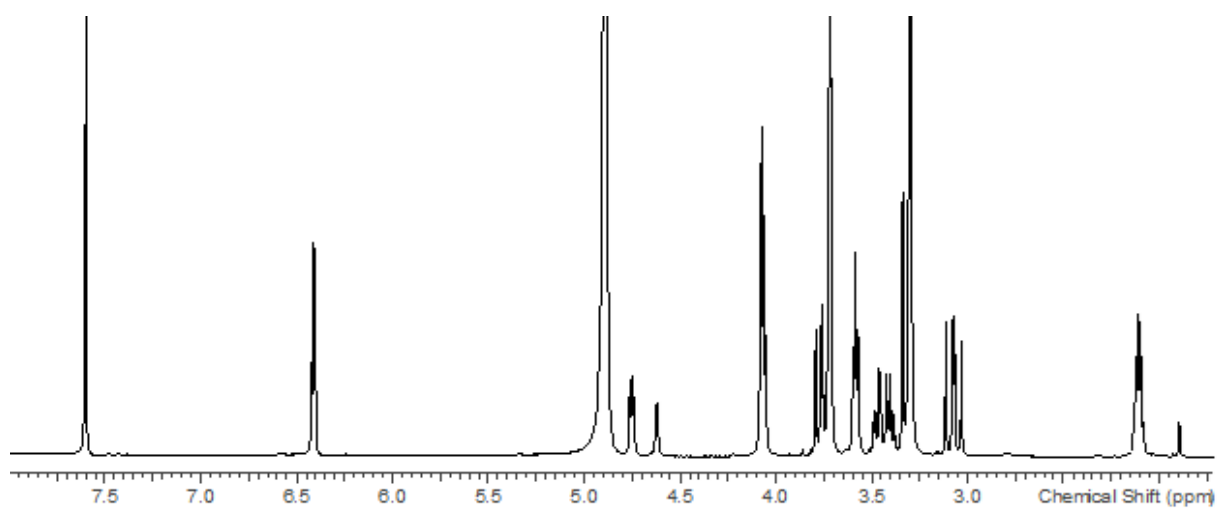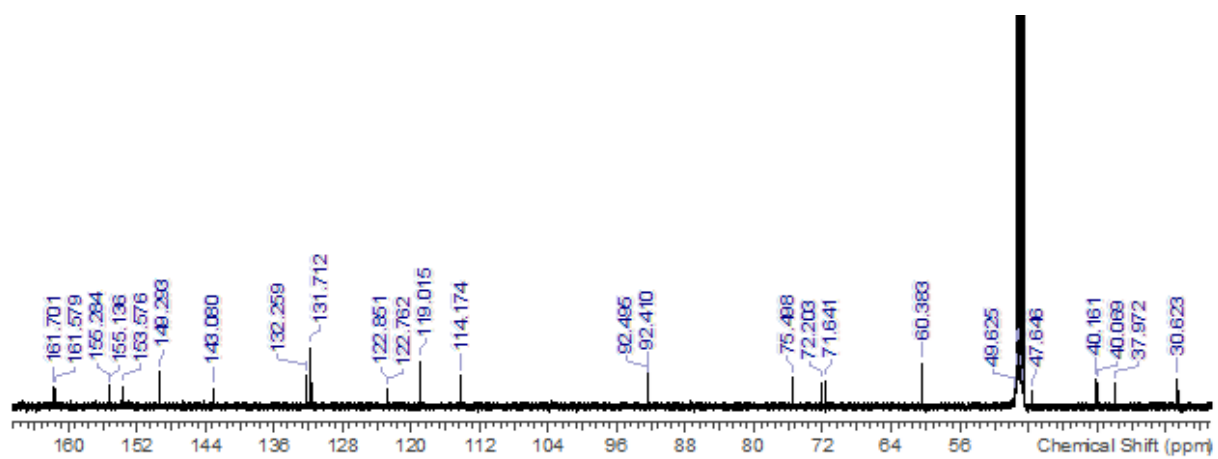

Figure S6.  $^1\text{H}$  and  $^{13}\text{C}$  NMR spectra for **5** in  $\text{CD}_3\text{OD}$ .

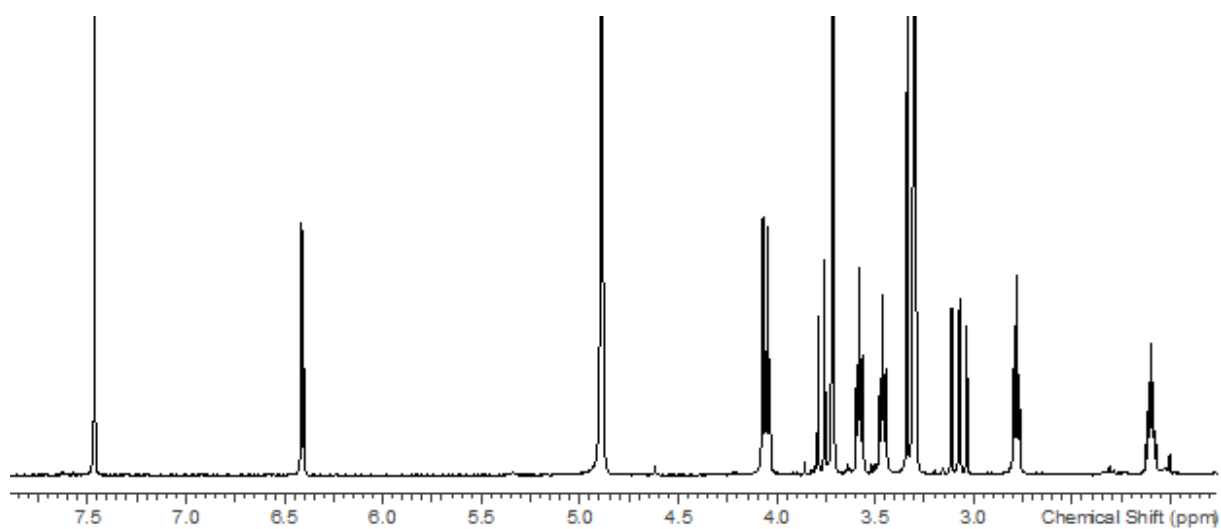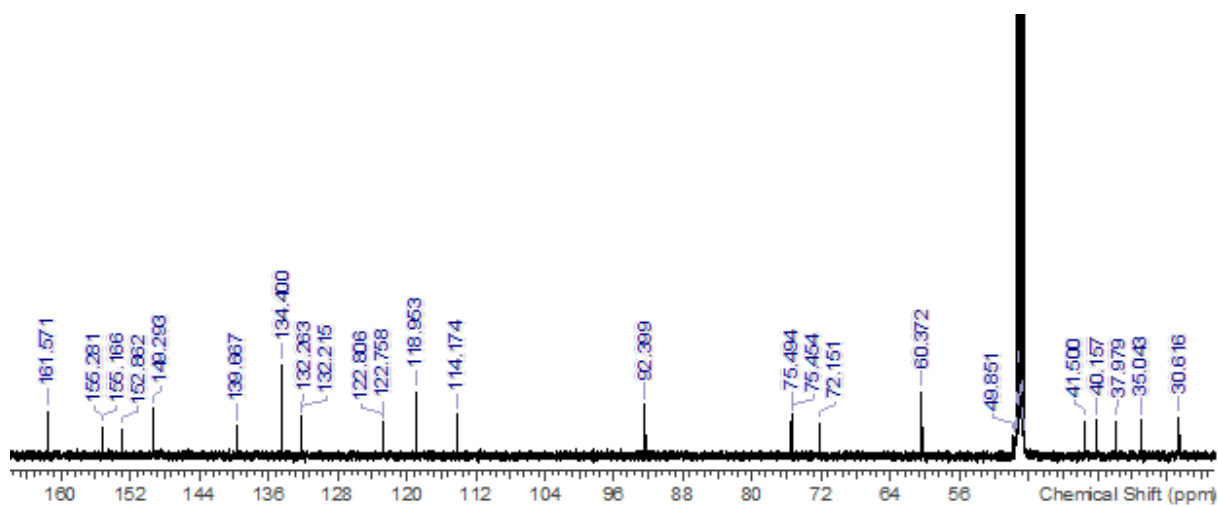

Figure S7.  $^1\text{H}$  and  $^{13}\text{C}$  NMR spectra for **6** in  $\text{CD}_3\text{OD}$ .



(A)

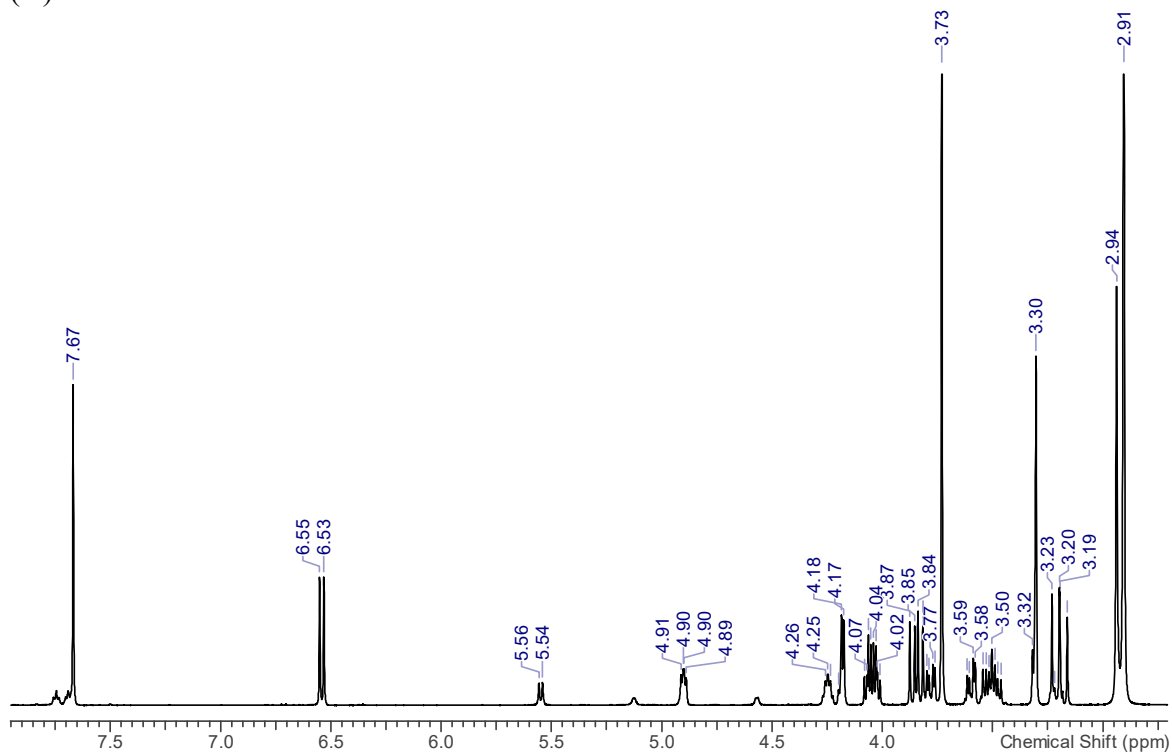

(B)

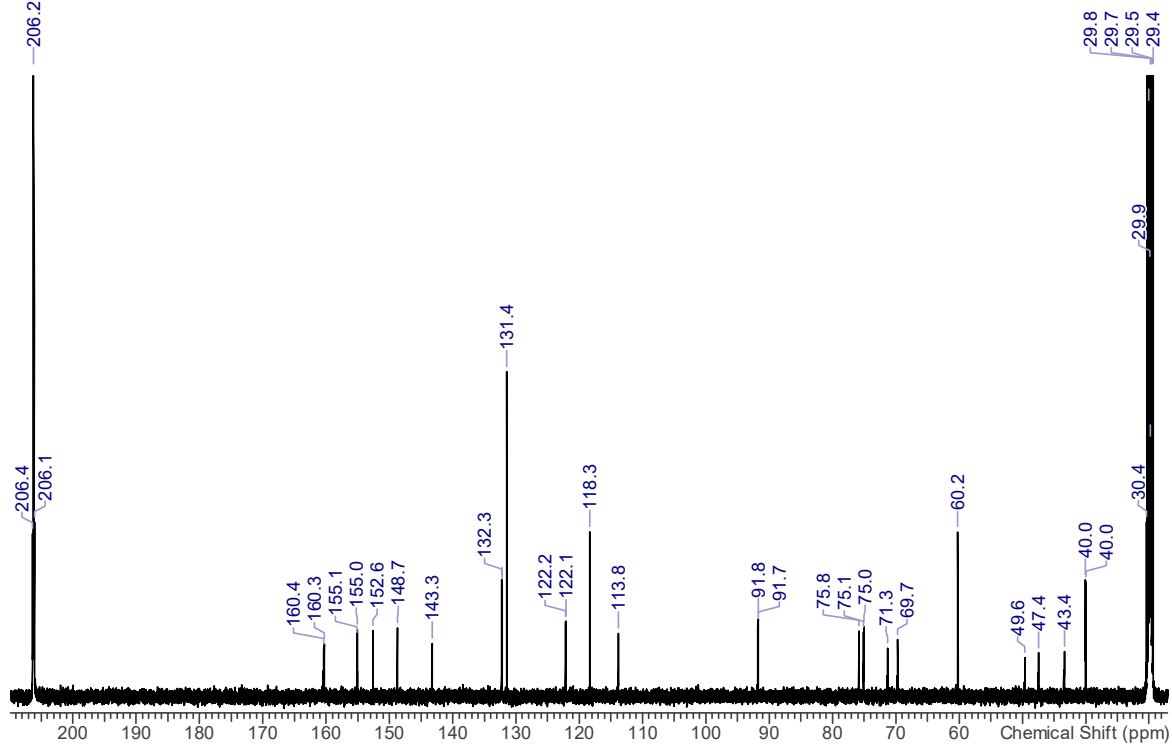

Figure S8. (A)  $^1\text{H}$  NMR and (B)  $^{13}\text{C}$  NMR spectra of **3** in acetone- $d_6$ .

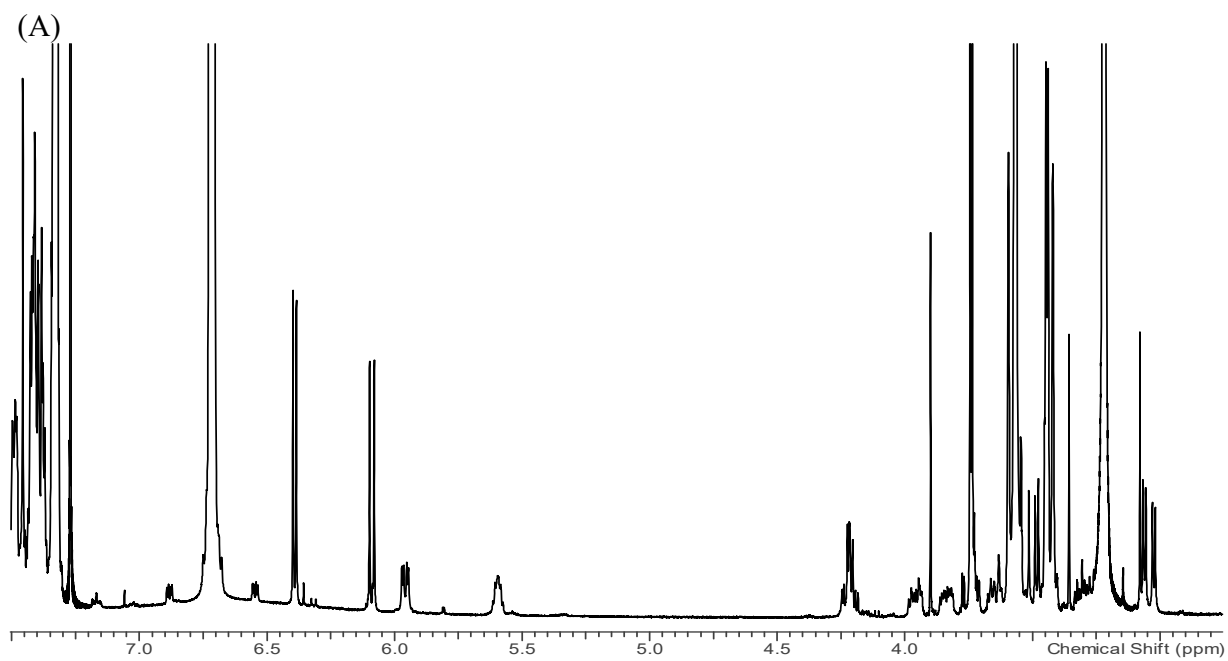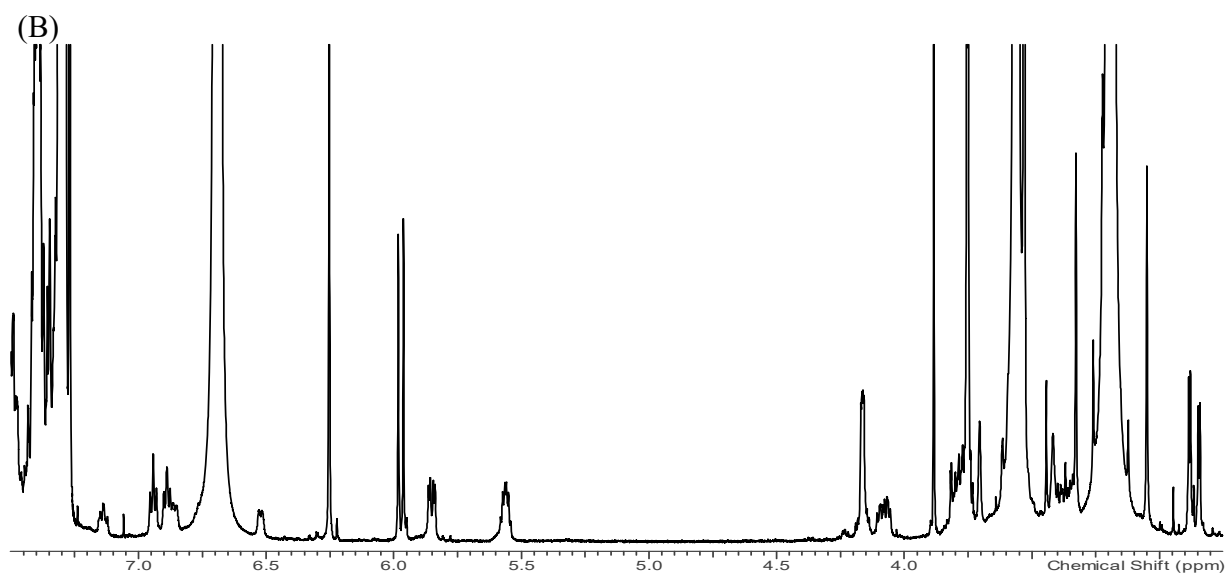

Figure S9.  $^1\text{H}$  NMR spectra for (A) (*S*)-MTPA ester and (B) (*R*)-MTPA ester of **3** in  $\text{CDCl}_3$ .

(A)

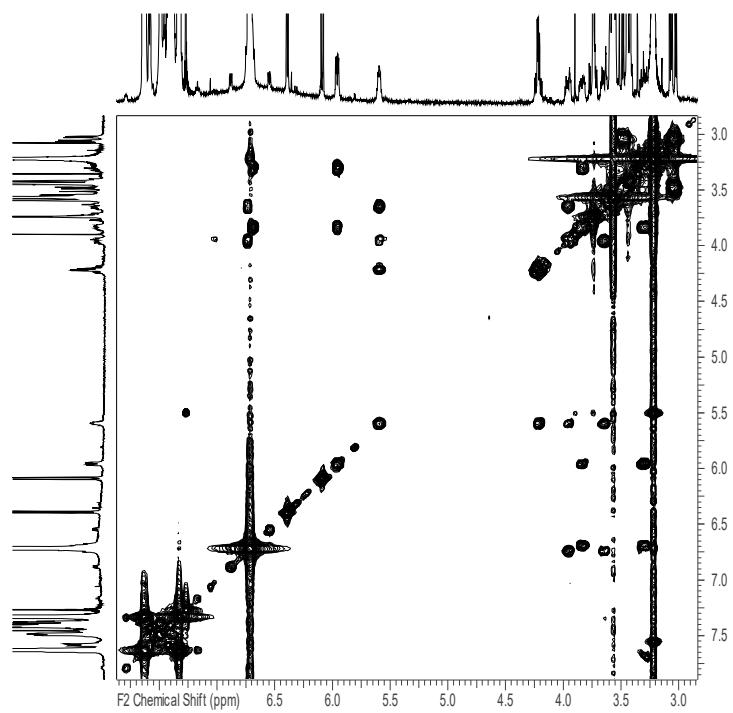

(B)

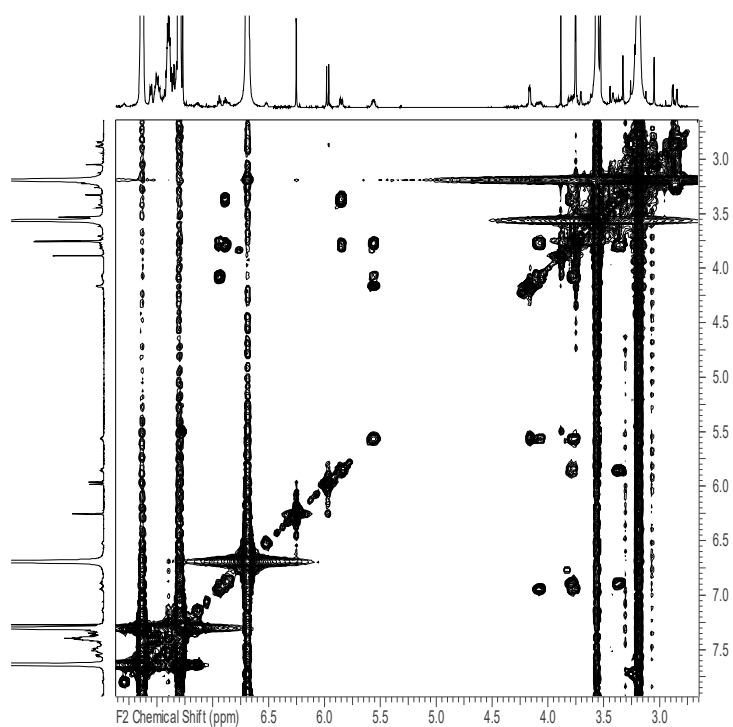

Figure S10. COSY NMR spectra for (A) (*S*)-MTPA ester and (B) (*R*)-MTPA ester of **3** in CDCl<sub>3</sub>.

Table S1. NMR Chemical shifts for compounds **1-2** (500MHz for <sup>1</sup>H, in CD<sub>3</sub>OD)

|                  | FS-1 (1)                                     |                       | FS-2 (2)                                     |                       |
|------------------|----------------------------------------------|-----------------------|----------------------------------------------|-----------------------|
|                  | <sup>1</sup> H                               | <sup>13</sup> C       | <sup>1</sup> H                               | <sup>13</sup> C       |
| 1, 1'            | 4.08, s                                      | 75.5, CH              | 4.08, s                                      | 75.4, CH              |
| 2, 2'            |                                              | 114.2, C              |                                              | 114.2, C              |
| 3, 3'            |                                              | 149.3, C              |                                              | 149.3, C              |
| 4, 4'            |                                              | 122.8, C              |                                              | 122.9, C              |
| 5, 5'            | 6.43, s                                      | 132.2, CH             | 6.41, s                                      | 132.2, CH             |
| 6, 6'            |                                              | 92.5, C               |                                              | 92.5, C               |
| 7, 7'            | 3.10, d (18.3)<br>3.78, d (18.3)             | 40.1, CH <sub>2</sub> | 3.05, d (18.4)<br>3.74, d (18.4)             | 40.1, CH <sub>2</sub> |
| 8, 8'            |                                              | 155.3, C              |                                              | 155.1, C              |
| 9, 9'            |                                              | 161.8, C              |                                              | 161.7, C              |
| 10               | 3.50, dd (13.7, 7.7)<br>3.70, dd (13.7, 4.7) | 43.7, CH <sub>2</sub> | 3.77, t (8.8)<br>3.82, dd (8.8, 6.4)         | 43.1, CH <sub>2</sub> |
| 11               | 4.22, m                                      | 70.0, CH              | 5.03, m                                      | 76.4, CH              |
| 12               | 4.01, dd (9.3, 5.4)<br>4.05, dd (9.3, 5.4)   | 76.0, CH <sub>2</sub> | 4.19, dd (10.5, 3.9)<br>4.05, dd (10.5, 4.4) | 73.7, CH <sub>2</sub> |
| 13               |                                              | 154.3, C              |                                              | 152.7, C              |
| 14, 14'          |                                              | 119.5, C              |                                              | 118.8, C              |
| 15, 15'          | 7.65, s                                      | 131.4, CH             | 7.61, s                                      | 131.9, CH             |
| 16               |                                              | 139.9, C              |                                              | 143.3, C              |
| 17               | 5.61, dd (9.1, 7.1)                          | 77.2, CH              | 4.76, dd (7.3, 4.6)                          | 71.6, CH              |
| 18               | 3.43, dd (9.1, 7.1)<br>3.97, t (9.1)         | 49.1, CH <sub>2</sub> | 3.41, dd (13.7, 7.3)<br>3.47, dd (13.7, 4.9) | 47.6, CH <sub>2</sub> |
| OCH <sub>3</sub> | 3.72, s                                      | 60.4, CH <sub>3</sub> | 3.72, s                                      | 60.4, CH <sub>3</sub> |

Table S1. <sup>1</sup>H NMR Chemical shifts for compounds **3-6** (500 MHz, in CD<sub>3</sub>OD)

| no               | FS-3 (3)                                          | 17-deoxyFS-3 (4)                                  | 11-deoxyFS-3 (5)                                  | 11,17-dideoxyFS-3 (6)                          |
|------------------|---------------------------------------------------|---------------------------------------------------|---------------------------------------------------|------------------------------------------------|
| 1, 1'            | 4.08, s                                           | 4.07, s / 4.08, s                                 | 4.08, s                                           | 4.07, s                                        |
| 5, 5'            | 6.41, s / 6.42, s                                 | 6.41, s / 6.42, s                                 | 6.41, s / 6.42, s                                 | 6.41, s / 6.42, s                              |
| 7, 7'            | 3.05 / 3.75, d<br>(18.3) 3.10 / 3.78,<br>d (18.3) | 3.05 / 3.74, d<br>(18.3) 3.10 / 3.78,<br>d (18.3) | 3.05 / 3.74, d<br>(18.3) 3.10 / 3.78,<br>d (18.3) | 3.05 / 3.74, d (18.1)<br>3.09 / 3.77, d (18.1) |
| 10               | 3.50, dd (13.9, 7.6)                              | 3.50, dd (13.9, 7.6)                              | 3.58, t (7.1)                                     | 3.58, t (6.9)                                  |
| 11               | 3.71, dd (13.9, 4.7)                              | 3.71, dd (13.9, 4.4)                              | 3.58, t (7.1)                                     | 2.10, m                                        |
| 12               | 4.20, m<br>3.98, dd (9.1, 5.6)                    | 4.19, m<br>3.98, dd (9.1, 5.4)                    | 2.11, m<br>4.06, t (6.1)                          | 4.05, t (6.1)<br>4.05, t (6.1)                 |
| 15,              | 4.03, dd (9.1, 5.6)                               | 4.01, dd, 9.1, 5.4)                               | 4.06, t (6.1)                                     | 7.47, s                                        |
| 15'              | 7.60, s                                           | 7.48, s                                           | 7.60, s                                           | 2.78, t (7.3)                                  |
| 17               | 4.76, dd (7.3, 4.7)                               | 2.79, t (7.1)                                     | 4.75, dd (7.3, 4.9)                               | 3.46, t (7.3)                                  |
| 18               | 3.41, dd (13.7, 7.3)<br>3.47, dd (13.7, 4.7)      | 3.47, t (7.1)<br>3.47, t (7.1)                    | 3.40, dd (13.7, 7.3)<br>3.47, dd (13.7, 4.9)      | 3.46, t (7.3)<br>3.72, s                       |
| OCH <sub>3</sub> | 3.72, s                                           | 3.72, s                                           | 3.72, s                                           | 3.72, s                                        |

Table S1. <sup>13</sup>C NMR Chemical shifts for compounds **3-6** (125 MHz, in CD<sub>3</sub>OD)

| no               | FS-3 (3)                                       | 17-deoxyFS-3 (4)             | 11-deoxyFS-3 (5)             | 11,17-dideoxyFS-3 (6)        |
|------------------|------------------------------------------------|------------------------------|------------------------------|------------------------------|
| 1, 1'            | 75.5 / 75.5, CH                                | 75.5 / 75.5, CH              | 75.4 / 75.5, CH              | 75.5 / 75.5, CH              |
| 2, 2'            | 114.2 / 114.2, C                               | 114.2 / 114.2, C             | 114.2 / 114.2, C             | 114.2 / 114.2, C             |
| 3, 3'            | 149.3 / 149.3, C                               | 149.3 / 149.3, C             | 149.3 / 149.3, C             | 149.3 / 149.3, C             |
| 4, 4'            | 122.8 / 122.9, C                               | 122.8 / 122.8, C             | 122.8 / 122.9, C             | 122.8 / 122.9, C             |
| 5, 5'            | 132.2 / 132.3, CH                              | 132.2 / 132.2, CH            | 132.2 / 132.3, CH            | 132.2 / 132.3, CH            |
| 6, 6'            | 92.4 / 92.5, C                                 | 92.4 / 92.5, C               | 92.4 / 92.5, C               | 92.4 / 92.4, C               |
| 7, 7'            | 40.1 / 40.1, CH <sub>2</sub>                   | 40.1 / 40.1, CH <sub>2</sub> | 40.1 / 40.2, CH <sub>2</sub> | 40.1 / 40.2, CH <sub>2</sub> |
| 8, 8'            | 155.2 / 155.2, C                               | 155.2 / 155.2, C             | 155.1 / 155.2, C             | 155.2 / 155.3, C             |
| 9, 9'            | 155.1 / 155.2, C                               | 161.6 / 161.8, C             | 161.6 / 161.7, C             | 161.6 / 161.6, C             |
| 10               | 161.7 / 161.8, C                               | 43.7, CH <sub>2</sub>        | 38.0, CH <sub>2</sub>        | 38.0, CH <sub>2</sub>        |
| 11               | 43.7, CH <sub>2</sub>                          | 70.0, CH                     | 30.6, CH                     | 30.6, CH                     |
| 12               | 70.0, CH                                       | 75.8, CH <sub>2</sub>        | 72.2, CH <sub>2</sub>        | 72.2, CH <sub>2</sub>        |
| 13               | 75.9, CH <sub>2</sub>                          | 152.6, C                     | 153.6, C                     | 152.9, C                     |
| 14, 14'          | 153.3, C                                       | 118.8 / 118.8, C             | 119.0 / 119.0, C             | 119.0 / 119.0, C             |
| 15, 15'          | 118.9 / 118.9, C                               | 134.5 / 134.5, CH            | 131.7 / 131.7, CH            | 134.4 / 134.4, CH            |
| 16               | 143.3 / 143.3, CH                              | 139.9, C                     | 143.1, C                     | 139.7, C                     |
| 17               | 143.3, C                                       | 35.0, CH                     | 71.6, CH                     | 35.0, CH                     |
| 18               | 71.6, CH                                       | 41.5, CH <sub>2</sub>        | 47.6, CH <sub>2</sub>        | 41.5, CH <sub>2</sub>        |
| OCH <sub>3</sub> | 47.6, CH <sub>2</sub><br>60.4, CH <sub>3</sub> | 60.4, CH <sub>3</sub>        | 60.4, CH <sub>3</sub>        | 60.4, CH <sub>3</sub>        |

\*Consistent chemical shifts were highlighted with the same color.

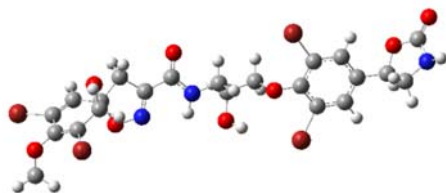

**1a (17R)**

Table S2. Calculated Carbon Shielding Tensors for Conformers of **1a**

| conformers             | <b>1</b> | <b>2</b> | <b>3</b> | <b>4</b> | <b>5</b> | <b>6</b> |
|------------------------|----------|----------|----------|----------|----------|----------|
| Boltzmann Distribution | 0.32     | 0.27     | 0.15     | 0.09     | 0.09     | 0.08     |
| 1                      | 109.7    | 109.4    | 110.6    | 110.1    | 109.7    | 109.9    |
| 2                      | 47.9     | 48.3     | 46.0     | 47.4     | 46.9     | 47.5     |
| 3                      | 29.7     | 29.8     | 29.9     | 30.0     | 29.8     | 30.3     |
| 4                      | 40.1     | 40.6     | 39.9     | 39.7     | 39.9     | 40.5     |
| 5                      | 47.9     | 47.6     | 47.2     | 48.2     | 47.7     | 47.5     |
| 6                      | 91.6     | 91.7     | 91.2     | 92.5     | 92.7     | 92.9     |
| 7                      | 145.0    | 144.8    | 145.0    | 144.7    | 144.5    | 144.5    |
| 8                      | 25.6     | 25.7     | 24.7     | 24.1     | 24.1     | 24.6     |
| 9                      | 17.8     | 17.9     | 20.1     | 23.6     | 23.6     | 23.7     |
| 10                     | 140.4    | 140.1    | 146.3    | 144.1    | 143.9    | 144.1    |
| 11                     | 114.1    | 114.2    | 115.1    | 111.9    | 112.3    | 111.9    |
| 12                     | 113.9    | 113.9    | 109.4    | 110.3    | 110.2    | 110.3    |
| 13                     | 28.3     | 28.4     | 24.7     | 28.3     | 28.3     | 28.4     |
| 14                     | 45.8     | 44.5     | 44.6     | 44.9     | 45.7     | 44.4     |
| 14                     | 44.4     | 45.8     | 45.5     | 45.9     | 44.6     | 45.8     |
| 15                     | 51.8     | 53.4     | 46.5     | 51.2     | 51.2     | 52.3     |
| 15                     | 53.8     | 51.8     | 49.7     | 50.8     | 51.8     | 51.5     |
| 16                     | 41.1     | 41.0     | 43.2     | 43.6     | 43.8     | 43.6     |
| 17                     | 109.6    | 109.7    | 106.6    | 107.1    | 107.2    | 107.6    |
| 18                     | 135.2    | 134.9    | 138.5    | 133.8    | 134.1    | 134.4    |
| 9'                     | 21.6     | 22.0     | 21.6     | 21.6     | 21.7     | 21.8     |
| OCH <sub>3</sub>       | 126.4    | 126.3    | 127.4    | 126.5    | 126.4    | 126.6    |

Table S3. Calculated Proton Shielding Tensors for Conformers of **1a**

| conformers                | <b>1</b> | <b>2</b> | <b>3</b> | <b>4</b> | <b>5</b> | <b>6</b> |
|---------------------------|----------|----------|----------|----------|----------|----------|
| Boltzmann<br>Distribution | 0.32     | 0.27     | 0.15     | 0.09     | 0.09     | 0.08     |
| 1                         | 27.58    | 27.53    | 27.94    | 27.66    | 27.60    | 27.62    |
| 5                         | 25.38    | 25.40    | 25.42    | 25.35    | 25.30    | 25.39    |
| 7                         | 28.63    | 28.58    | 28.82    | 27.60    | 27.52    | 27.61    |
| 7                         | 27.64    | 27.68    | 28.04    | 28.67    | 28.65    | 28.64    |
| 10                        | 28.08    | 28.07    | 27.80    | 28.33    | 28.27    | 28.31    |
| 10                        | 27.47    | 27.51    | 27.37    | 27.30    | 27.40    | 27.35    |
| 11                        | 28.03    | 28.02    | 29.01    | 28.02    | 28.00    | 28.01    |
| 12                        | 27.81    | 27.82    | 27.30    | 27.20    | 27.21    | 27.35    |
| 12                        | 27.09    | 27.02    | 28.60    | 27.79    | 27.70    | 27.62    |
| 15                        | 24.15    | 23.97    | 24.03    | 23.72    | 24.15    | 23.68    |
| 15                        | 24.04    | 24.14    | 23.58    | 24.16    | 23.75    | 24.11    |
| 17                        | 26.11    | 26.12    | 26.36    | 26.26    | 26.19    | 26.18    |
| 18                        | 28.46    | 28.38    | 27.89    | 28.54    | 28.63    | 28.62    |
| 18                        | 27.64    | 27.59    | 27.59    | 27.99    | 28.01    | 27.99    |
| OCH <sub>3</sub>          | 27.86    | 27.87    | 27.98    | 28.23    | 28.23    | 28.26    |
| OCH <sub>3</sub>          | 27.88    | 27.88    | 27.92    | 27.88    | 27.87    | 27.88    |
| OCH <sub>3</sub>          | 28.25    | 28.20    | 28.19    | 27.92    | 27.90    | 27.91    |

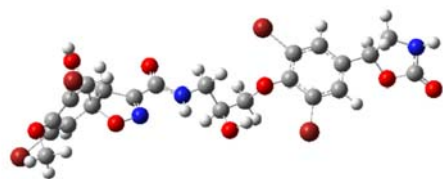

**1b (17S)**

Table S4. Calculated Carbon Shielding Tensors for Conformers of **1b**

| conformers             | <b>1</b> | <b>2</b> | <b>3</b> | <b>4</b> | <b>5</b> | <b>6</b> |
|------------------------|----------|----------|----------|----------|----------|----------|
| Boltzmann Distribution | 0.18     | 0.18     | 0.16     | 0.16     | 0.16     | 0.15     |
| 1                      | 110.1    | 110.0    | 109.5    | 110.2    | 110.0    | 110.4    |
| 2                      | 47.3     | 47.6     | 47.8     | 47.4     | 47.6     | 47.7     |
| 3                      | 30.5     | 29.9     | 30.3     | 30.0     | 30.2     | 29.8     |
| 4                      | 40.5     | 40.0     | 40.0     | 40.5     | 40.4     | 39.6     |
| 5                      | 47.9     | 47.5     | 47.4     | 48.0     | 47.8     | 48.0     |
| 6                      | 92.7     | 92.7     | 92.6     | 92.6     | 92.7     | 92.6     |
| 7                      | 144.5    | 144.6    | 144.4    | 144.5    | 144.4    | 144.8    |
| 8                      | 24.1     | 24.2     | 24.4     | 23.8     | 23.9     | 23.7     |
| 9                      | 23.8     | 23.9     | 23.6     | 23.7     | 23.8     | 24.0     |
| 10                     | 143.7    | 143.7    | 143.5    | 143.3    | 143.4    | 143.5    |
| 11                     | 111.9    | 112.0    | 112.1    | 112.4    | 112.5    | 112.1    |
| 12                     | 110.1    | 110.1    | 110.1    | 110.4    | 110.2    | 110.2    |
| 13                     | 28.4     | 28.3     | 28.9     | 28.5     | 28.6     | 28.2     |
| 14                     | 44.9     | 45.6     | 44.6     | 45.5     | 45.1     | 44.9     |
| 14                     | 45.5     | 44.9     | 45.3     | 45.2     | 45.7     | 45.5     |
| 15                     | 51.7     | 50.5     | 52.5     | 51.1     | 52.1     | 51.5     |
| 15                     | 50.8     | 51.4     | 51.6     | 52.1     | 51.2     | 50.7     |
| 16                     | 43.7     | 43.5     | 43.5     | 43.7     | 43.5     | 43.6     |
| 17                     | 107.0    | 106.9    | 107.5    | 107.3    | 107.5    | 106.9    |
| 18                     | 134.0    | 133.9    | 134.4    | 134.1    | 134.2    | 133.7    |
| 9'                     | 21.7     | 21.7     | 21.9     | 21.8     | 21.7     | 21.7     |
| OCH <sub>3</sub>       | 126.5    | 126.4    | 126.3    | 126.4    | 126.4    | 126.5    |



Table S5. Calculated Proton Shielding Tensors for Conformers of **1a**

| conformers             | <b>1</b> | <b>2</b> | <b>3</b> | <b>4</b> | <b>5</b> | <b>6</b> |
|------------------------|----------|----------|----------|----------|----------|----------|
| Boltzmann Distribution | 0.18     | 0.18     | 0.16     | 0.16     | 0.16     | 0.15     |
| 1                      | 25.36    | 25.37    | 25.37    | 25.36    | 25.38    | 25.29    |
| 5                      | 27.64    | 27.60    | 27.62    | 27.65    | 27.66    | 27.57    |
| 7                      | 27.63    | 27.51    | 27.58    | 27.60    | 27.59    | 27.57    |
| 7                      | 28.72    | 28.67    | 28.69    | 28.67    | 28.67    | 28.63    |
| 10                     | 28.35    | 28.35    | 28.29    | 28.30    | 28.30    | 28.31    |
| 10                     | 27.39    | 27.31    | 27.43    | 27.38    | 27.47    | 27.39    |
| 11                     | 28.01    | 28.03    | 27.98    | 27.99    | 27.96    | 28.00    |
| 12                     | 27.26    | 27.33    | 27.18    | 27.31    | 27.20    | 27.18    |
| 12                     | 27.76    | 27.70    | 27.73    | 27.66    | 27.71    | 27.75    |
| 15                     | 24.15    | 23.72    | 23.68    | 23.72    | 24.14    | 23.67    |
| 15                     | 23.71    | 24.14    | 24.13    | 24.13    | 23.70    | 24.16    |
| 17                     | 26.23    | 26.20    | 26.19    | 26.26    | 26.17    | 26.16    |
| 18                     | 28.00    | 28.02    | 28.01    | 27.99    | 28.01    | 28.01    |
| 18                     | 28.53    | 28.54    | 28.60    | 28.52    | 28.60    | 28.61    |
| OCH <sub>3</sub>       | 27.86    | 27.95    | 27.93    | 27.90    | 27.89    | 27.83    |
| OCH <sub>3</sub>       | 28.27    | 28.22    | 28.21    | 28.21    | 28.22    | 28.23    |
| OCH <sub>3</sub>       | 27.86    | 27.90    | 27.89    | 27.89    | 27.89    | 27.87    |

Table S6. Calculation of DP4+ probability for **1a** and **1b**

| Functional       | Solvent?                                                                                    |                                                                                           | Basis Set    |          | Type of Data      |          |
|------------------|---------------------------------------------------------------------------------------------|-------------------------------------------------------------------------------------------|--------------|----------|-------------------|----------|
| mPW1PW91         | PCM                                                                                         |                                                                                           | 6-311+G(d,p) |          | Shielding Tensors |          |
|                  | Isomer 1                                                                                    | Isomer 2                                                                                  | Isomer 3     | Isomer 4 | Isomer 5          | Isomer 6 |
| sDP4+ (H data)   |  100.00% |  0.00% | -            | -        | -                 | -        |
| sDP4+ (C data)   |  94.73%  |  5.27% | -            | -        | -                 | -        |
| sDP4+ (all data) |  100.00% |  0.00% | -            | -        | -                 | -        |
| uDP4+ (H data)   |  99.96%  |  0.04% | -            | -        | -                 | -        |
| uDP4+ (C data)   |  95.71%  |  4.29% | -            | -        | -                 | -        |
| uDP4+ (all data) |  100.00% |  0.00% | -            | -        | -                 | -        |
| DP4+ (H data)    |  100.00% |  0.00% | -            | -        | -                 | -        |
| DP4+ (C data)    |  99.75%  |  0.25% | -            | -        | -                 | -        |
| DP4+ (all data)  |  100.00% |  0.00% | -            | -        | -                 | -        |

Where, Isomer 1 = **1a**, Isomer 2 = **1b**
